# Supplementary material
Source: ML conference proceedings conference paper supplement (https://proceedings.mlr.press/v97/haochen19a.html)
Supplement: Supplementary file [file haochen19a-supp.pdf]

---

## Random Shuffling Beats SGD after Finite Epochs: Supplementary Material

---

### A. Proof of Theorem 1

*Proof.* Assume  $T = nl$  where  $l$  is positive integer. Notate  $x_i^t$  as the  $i$ th iteration for  $t$ th epoch. There is  $x_0^1 = x_0$ ,  $x_n^t = x_0^{t+1}$ ,  $x_n^l = x_T$ . Assume the permutation used in  $t$ th epoch is  $\sigma_t(\cdot)$ . Define error term

$$R^t = \sum_{i=1}^n \nabla f_{\sigma_t(i)}(x_{i-1}^t) - \sum_{i=1}^n \nabla f_{\sigma_t(i)}(x_0^t).$$

For one epoch of RANDOMSHUFFLE, We have the following inequality

$$\begin{aligned} \|x_n^t - x^*\|^2 &= \|x_0^t - x^*\|^2 - 2\gamma \left\langle x_0^t - x^*, \sum_{i=1}^n \nabla f_{\sigma_t(i)}(x_{i-1}^t) \right\rangle + \gamma^2 \left\| \sum_{i=1}^n \nabla f_{\sigma_t(i)}(x_{i-1}^t) \right\|^2 \\ &= \|x_0^t - x^*\|^2 - 2\gamma \langle x_0^t - x^*, n\nabla F(x_0^t) \rangle - 2\gamma \langle x_0^t - x^*, R^t \rangle + \gamma^2 \|n\nabla F(x_0^t) + R^t\|^2 \\ &\leq \|x_0^t - x^*\|^2 - 2n\gamma \left[ \frac{L\mu}{L+\mu} \|x_0^t - x^*\|^2 + \frac{1}{L+\mu} \|\nabla F(x_0^t)\|^2 \right] \\ &\quad - 2\gamma \langle x_0^t - x^*, R^t \rangle + 2\gamma^2 n^2 \|\nabla F(x_0^t)\|^2 + 2\gamma^2 \|R^t\|^2 \\ &= \left(1 - 2n\gamma \frac{L\mu}{L+\mu}\right) \|x_0^t - x^*\|^2 - \left(2n\gamma \frac{1}{L+\mu} - 2\gamma^2 n^2\right) \|\nabla F(x_0^t)\|^2 \\ &\quad - 2\gamma \langle x_0^t - x^*, R^t \rangle + 2\gamma^2 \|R^t\|^2, \end{aligned} \tag{A.1}$$

where the inequality is due to Theorem 2.1.11 in (Nesterov, 2013).

Take the expectation of (A.1) over randomness of permutation  $\sigma_t(\cdot)$ , we have

$$\begin{aligned} \mathbb{E} \left[ \|x_n^t - x^*\|^2 \right] &\leq \left(1 - 2n\gamma \frac{L\mu}{L+\mu}\right) \|x_0^t - x^*\|^2 - \left(2n\gamma \frac{1}{L+\mu} - 2n^2\gamma^2\right) \|\nabla F(x_0^t)\|^2 \\ &\quad - 2\gamma \langle x_0^t - x^*, \mathbb{E}[R^t] \rangle + 2\gamma^2 \mathbb{E} \left[ \|R^t\|^2 \right]. \end{aligned} \tag{A.2}$$

What remains to be done is to bound the two terms with  $R^t$  dependence. Firstly, we give a bound on the norm of  $R^t$ :

$$\begin{aligned} \|R^t\| &= \left\| \sum_{i=1}^n \nabla f_{\sigma_t(i)}(x_{i-1}^t) - \sum_{i=1}^n \nabla f_{\sigma_t(i)}(x_0^t) \right\| \\ &\leq \sum_{i=1}^n \left\| \nabla f_{\sigma_t(i)}(x_{i-1}^t) - \nabla f_{\sigma_t(i)}(x_0^t) \right\| \\ &= \sum_{i=1}^n \left\| \sum_{j=1}^{i-1} (\nabla f_{\sigma_t(i)}(x_j^t) - \nabla f_{\sigma_t(i)}(x_{j-1}^t)) \right\| \\ &\leq \sum_{i=1}^n \sum_{j=1}^{i-1} \left\| \nabla f_{\sigma_t(i)}(x_j^t) - \nabla f_{\sigma_t(i)}(x_{j-1}^t) \right\| \\ &\leq \sum_{i=1}^n \sum_{j=1}^{i-1} L \|x_j^t - x_{j-1}^t\| \end{aligned}$$

$$\begin{aligned}
 &= \sum_{i=1}^n \sum_{j=1}^{i-1} L \left\| -\gamma \nabla f_{\sigma_t(j)}(x_{j-1}^t) \right\| \\
 &\leq \sum_{i=1}^n \sum_{j=1}^{i-1} L \gamma G \\
 &= \frac{n(n-1)}{2} \gamma GL,
 \end{aligned}$$

where the first and second inequality is by triangle inequality of vector norm, the third inequality is by definition of  $L$ , the fourth inequality is by definition of  $G$ . By this result, we have

$$\mathbb{E} \left[ \|R^t\|^2 \right] \leq \frac{n^4}{4} \gamma^2 G^2 L^2. \quad (\text{A.3})$$

For the  $\mathbb{E}[R^t]$  term, we need more careful bound. Since the Hessian is constant for quadratic functions, we use  $H_i$  to denote the Hessian matrix of function  $f_i(\cdot)$ . We begin with the following decomposition:

$$\begin{aligned}
 R^t &= \sum_{i=1}^n \left[ \nabla f_{\sigma_t(i)}(x_{i-1}^t) - \nabla f_{\sigma_t(i)}(x_0^t) \right] \\
 &= \sum_{i=1}^n \left[ H_{\sigma_t(i)}(x_{i-1}^t - x_0^t) \right] \\
 &= \sum_{i=1}^n \left\{ H_{\sigma_t(i)} \sum_{j=1}^{i-1} \left[ -\gamma \nabla f_{\sigma_t(j)}(x_{j-1}^t) \right] \right\} \\
 &= \sum_{i=1}^n \left\{ -\gamma H_{\sigma_t(i)} \sum_{j=1}^{i-1} \left[ \nabla f_{\sigma_t(j)}(x_0^t) + (\nabla f_{\sigma_t(j)}(x_{j-1}^t) - \nabla f_{\sigma_t(j)}(x_0^t)) \right] \right\} \\
 &= -\gamma \sum_{i=1}^n \left[ H_{\sigma_t(i)} \sum_{j=1}^{i-1} \nabla f_{\sigma_t(j)}(x_0^t) \right] - \gamma \sum_{i=1}^n \left\{ H_{\sigma_t(i)} \sum_{j=1}^{i-1} \left[ \nabla f_{\sigma_t(j)}(x_{j-1}^t) - \nabla f_{\sigma_t(j)}(x_0^t) \right] \right\} \\
 &= A^t + B^t.
 \end{aligned} \quad (\text{A.4})$$

Here we define random variables

$$\begin{aligned}
 A^t &= -\gamma \sum_{i=1}^n \left[ H_{\sigma_t(i)} \sum_{j=1}^{i-1} \nabla f_{\sigma_t(j)}(x_0^t) \right], \\
 B^t &= -\gamma \sum_{i=1}^n \left\{ H_{\sigma_t(i)} \sum_{j=1}^{i-1} \left[ \nabla f_{\sigma_t(j)}(x_{j-1}^t) - \nabla f_{\sigma_t(j)}(x_0^t) \right] \right\}.
 \end{aligned}$$

There is

$$\mathbb{E}[A^t] = -\frac{n(n-1)}{2} \gamma \mathbb{E}_{i \neq j} [H_i \nabla f_j(x_0^t)], \quad (\text{A.5})$$

$$\begin{aligned}
 \|B^t\| &\leq \gamma \sum_{i=1}^n H_{\sigma_t(i)} \sum_{j=1}^{i-1} \left\| \nabla f_{\sigma_t(j)}(x_{j-1}^t) - \nabla f_{\sigma_t(j)}(x_0^t) \right\| \\
 &\leq \gamma \sum_{i=1}^n L \sum_{j=1}^{i-1} (j-1) \gamma GL \\
 &= \gamma^2 L^2 G \sum_{i=1}^n \frac{(i-1)(i-2)}{2}
 \end{aligned}$$

$$\leq \frac{1}{2}\gamma^2 L^2 G n^3. \quad (\text{A.6})$$

Using (A.4) and (A.5), we can decompose the inner product of  $x_0^t - x^*$  and  $\mathbb{E}[R^t]$  into:

$$\begin{aligned} -2\gamma \langle x_0^t - x^*, \mathbb{E}[R^t] \rangle &= -2\gamma \langle x_0^t - x^*, \mathbb{E}[A^t] + \mathbb{E}[B^t] \rangle \\ &= -2\gamma \langle x_0^t - x^*, \mathbb{E}[A^t] \rangle - 2\gamma \langle x_0^t - x^*, \mathbb{E}[B^t] \rangle \\ &= \gamma^2 n(n-1) \langle x_0^t - x^*, \mathbb{E}_{i \neq j} H_i \nabla f_j(x_0^t) \rangle - 2\gamma \langle x_0^t - x^*, \mathbb{E}[B^t] \rangle. \end{aligned} \quad (\text{A.7})$$

For the first term in (A.7), there is

$$\begin{aligned} &\gamma^2 n(n-1) \langle x_0^t - x^*, \mathbb{E}_{i \neq j} H_i \nabla f_j(x_0^t) \rangle \\ &= \gamma^2 n(n-1) \langle x_0^t - x^*, \mathbb{E}_{i \neq j} H_i [\nabla f_j(x_0^t) - \nabla f_j(x^*)] \rangle + \gamma^2 n(n-1) \langle x_0^t - x^*, \mathbb{E}_{i \neq j} H_i \nabla f_j(x^*) \rangle \\ &\leq \gamma^2 n^2 \langle x_0^t - x^*, \mathbb{E}_{i,j} H_i H_j (x_0^t - x^*) \rangle + \gamma^2 n(n-1) \left[ \frac{\lambda_1}{2} \|x_0^t - x^*\|^2 + \frac{1}{2\lambda_1} \|\Delta\|^2 \right] \\ &\leq \gamma^2 n^2 \|\nabla F(x_0^t)\|^2 + \frac{1}{4}\gamma\mu(n-1) \|x_0^t - x^*\|^2 + \gamma^3 \mu^{-1} n^2 (n-1) \|\Delta\|^2. \end{aligned} \quad (\text{A.8})$$

Here we introduce variable  $\Delta = \mathbb{E}_{i \neq j} [H_i \nabla f_j(x^*)]$  for simplicity of notation, with  $i, j$  uniformly sampled from all pairs of different indices. The first inequality is by  $\langle x_0^t - x^*, H_i H_j (x_0^t - x^*) \rangle \geq 0$  and AM-GM inequality, where  $\lambda_1$  is any positive number. The second inequality comes from noticing that  $\mathbb{E}_{i,j} H_i H_j = H^2$  (with  $i, j$  uniformly sampled from all pairs of indices), and let  $\lambda_1 = \frac{1}{2}\mu\gamma^{-1}n^{-1}$ .

For the second term in (A.7), we use the bound

$$-2\gamma \langle x_0^t - x^*, \mathbb{E}[B^t] \rangle \leq 2\gamma \left[ \frac{\lambda_2}{2} \|x_0^t - x^*\|^2 + \frac{1}{2\lambda_2} \|\mathbb{E}[B^t]\|^2 \right]. \quad (\text{A.9})$$

Set  $\lambda_2 = \frac{1}{4}\mu(n-1)$  in (A.9) and using (A.6), there is

$$\begin{aligned} -2\gamma \langle x_0^t - x^*, \mathbb{E}[B^t] \rangle &\leq \frac{1}{4}\gamma\mu(n-1) \|x_0^t - x^*\|^2 + 4\gamma\mu^{-1}(n-1)^{-1} \|\mathbb{E}[B^t]\|^2 \\ &\leq \frac{1}{4}\gamma\mu(n-1) \|x_0^t - x^*\|^2 + \mu^{-1}(n-1)^{-1} \gamma^5 L^4 G^2 n^6 \\ &\leq \frac{1}{4}\gamma\mu(n-1) \|x_0^t - x^*\|^2 + 2\mu^{-1}\gamma^5 L^4 G^2 n^5. \end{aligned} \quad (\text{A.10})$$

Substituting (A.8) and (A.10) back to (A.7), we get

$$\begin{aligned} -2\gamma \langle x_0^t - x^*, \mathbb{E}[R^t] \rangle &\leq \gamma^2 n^2 \|\nabla F(x_0^t)\|^2 + \frac{1}{2}\gamma\mu(n-1) \|x_0^t - x^*\|^2 \\ &\quad + \gamma^3 \mu^{-1} n^2 (n-1) \|\Delta\|^2 + 2\mu^{-1}\gamma^5 L^4 G^2 n^5. \end{aligned} \quad (\text{A.11})$$

The next step requires to bound the  $\|\Delta\|$  term. Toward this end, we use the following important fact:

$$\begin{aligned} \|\Delta\| &= \|\mathbb{E}_{i \neq j} H_i \nabla f_j(x^*)\| \\ &= \left\| \frac{1}{n(n-1)} \sum_{i \neq j} H_i \nabla f_j(x^*) \right\| \\ &= \left\| \frac{-1}{n(n-1)} \sum_i H_i \nabla f_i(x^*) \right\| \\ &= \frac{1}{n-1} \|\mathbb{E}_i [H_i \nabla f_i(x^*)]\| \\ &\leq \frac{1}{n-1} LG. \end{aligned} \quad (\text{A.12})$$

This fact captures the importance of randomly drawing a permutation instead of using a fixed one. Substituting (A.3) (A.11) back to (A.2) and using (A.12), we finally get a recursion bound for one epoch:

$$\begin{aligned}
 & \mathbb{E} \|x_n^t - x^*\|^2 \\
 & \leq \left(1 - 2n\gamma \frac{L\mu}{L+\mu} + \frac{1}{2}\gamma\mu(n-1)\right) \|x_0^t - x^*\|^2 - \left(2n\gamma \frac{1}{L+\mu} - 3\gamma^2 n^2\right) \|\nabla F(x_0^t)\|^2 \\
 & \quad + \gamma^3 \mu^{-1} n^2 (n-1) \|\Delta\|^2 + 2\mu^{-1} \gamma^5 L^4 G^2 n^5 + \frac{1}{2} n^4 \gamma^4 G^2 L^2 \\
 & \leq \left(1 - 2n\gamma \frac{L\mu}{L+\mu} + \frac{1}{2}\gamma\mu(n-1)\right) \|x_0^t - x^*\|^2 - \left(2n\gamma \frac{1}{L+\mu} - 3\gamma^2 n^2\right) \|\nabla F(x_0^t)\|^2 \\
 & \quad + 2\gamma^3 \mu^{-1} n L^2 G^2 + 2\mu^{-1} \gamma^5 L^4 G^2 n^5 + \frac{1}{2} n^4 \gamma^4 G^2 L^2
 \end{aligned} \tag{A.13}$$

Now assume

$$n\gamma \frac{L\mu}{L+\mu} > \frac{1}{2}\gamma\mu(n-1),$$

and

$$2n\gamma \frac{1}{L+\mu} - 3\gamma^2 n^2 > 0,$$

which we call assumption 1 and assumption 2, (A.13) can be further turned into:

$$\mathbb{E} \left[ \|x_n^t - x^*\|^2 \right] \leq \left(1 - n\gamma \frac{L\mu}{L+\mu}\right) \|x_0^t - x^*\|^2 + \gamma^3 n C_1 + \gamma^5 n^5 C_2 + \gamma^4 n^4 C_3, \tag{A.14}$$

where  $C_1 = 2\mu^{-1} L^2 G^2$ ,  $C_2 = 2\mu^{-1} L^4 G^2$ ,  $C_3 = \frac{1}{2} G^2 L^2$ . Now assume  $n\gamma \frac{L\mu}{L+\mu} < 1$ , which we call assumption 3. Expanding (A.14) over all epochs leads to a final bound of RANDOMSHUFFLE:

$$\mathbb{E} \left[ \|x_T - x^*\|^2 \right] \leq \left(1 - n\gamma \frac{L\mu}{L+\mu}\right)^{\frac{T}{n}} \|x_0 - x^*\|^2 + \frac{T}{n} (\gamma^3 n C_1 + \gamma^5 n^5 C_2 + \gamma^4 n^4 C_3). \tag{A.15}$$

Not substituting  $\gamma = \frac{4 \log T}{T\mu}$  into (A.15), we have:

$$\begin{aligned}
 \mathbb{E} \left[ \|x_T - x^*\|^2 \right] & \leq \left(1 - \frac{2n \log T}{T}\right)^{\frac{T}{2n \log T} 2 \log T} \|x_0 - x^*\|^2 + \frac{T}{n} (\gamma^3 n C_1 + \gamma^5 n^5 C_2 + \gamma^4 n^4 C_3) \\
 & \leq \frac{1}{T^2} \|x_0 - x^*\|^2 + \frac{1}{T^2} (\log T)^3 C_4 + \frac{n^3}{T^3} (\log T)^4 C_5 + \frac{n^4}{T^4} (\log T)^5 C_6,
 \end{aligned} \tag{A.16}$$

where  $C_4 = \frac{64C_1}{\mu^3}$ ,  $C_5 = \frac{256C_2}{\mu^4}$ ,  $C_6 = \frac{1024C_3}{\mu^5}$ . The first inequality uses the fact that

$$n \frac{4 \log T}{T\mu} \frac{L\mu}{L+\mu} \geq \frac{2n \log T}{T}.$$

The second inequality comes from  $(1-x)^{\frac{1}{x}} \leq \frac{1}{e}$  for  $0 < x < 1$ . Obviously, (A.16) is a result of the form  $\mathcal{O}\left(\frac{1}{T^2} + \frac{n^3}{T^3}\right)$ . Or in the expanding version with constant dependence, we have

$$\mathbb{E} \left[ \|x_T - x^*\|^2 \right] \leq \frac{(\log T)^2}{T^2} \left(D^2 + 128 \frac{L^2 G^2}{\mu^4}\right) + \frac{n^3 (\log T)^4}{T^3} 128 \frac{L^2 G^2}{\mu^4} + \frac{n^4 (\log T)^5}{T^4} 2048 \frac{L^4 G^2}{\mu^6}. \tag{A.17}$$

What remains to determine is to satisfy the three assumptions: (1)  $n\gamma \frac{L\mu}{L+\mu} > \frac{1}{2}\gamma\mu(n-1)$ , (2)  $2n\gamma \frac{1}{L+\mu} - 3\gamma^2 n^2 > 0$ , and (3)  $n\gamma \frac{L\mu}{L+\mu} < 1$ . The first is naturally satisfied since  $\frac{L\mu}{L+\mu} \geq \frac{1}{2}$  and  $n > n-1$ . The second assumption is equivalent to

$$\frac{T}{\log T} > 6 \left(1 + \frac{L}{\mu}\right) n.$$

Assumption 3 is equivalent to

$$\frac{T}{\log T} > \frac{4L}{L + \mu} n,$$

which is obviously satisfied when

$$\frac{T}{\log T} > 4n.$$

So we only need

$$\frac{T}{\log T} > 6 \left(1 + \frac{L}{\mu}\right) n.$$

So whenever  $\frac{T}{\log T} > 6 \left(1 + \frac{L}{\mu}\right) n$ , the three assumptions hold. Therefore the theorem is proved.  $\square$

## B. Proof of Theorem 2

*Proof.* The idea is similar to the proof of Theorem 1, with a slightly different analysis on the  $R^t$  term capturing the changing Hessian. For any  $i$ , we use  $H_i$  to denote  $H_i(x^*)$ . For any vector  $v$  not being zero, define vector value directional function

$$\text{dir}(v) = \frac{v}{\|v\|},$$

with norm being  $\ell_2$  norm. For the convenience of notation, we define  $\text{dir}(\vec{0}) = \vec{0}$ , where  $\vec{0}$  is the zero vector. For any two points  $a, b \in \mathbb{R}^d$ , and a matrix function  $g(\cdot) : \mathbb{R}^d \rightarrow \mathbb{R}^{d \times d}$ , define line integral:

$$\int_a^b g(x) dx := \int_0^{\|b-a\|} g\left(a + t \frac{b-a}{\|b-a\|}\right) \text{dir}(b-a) dt,$$

where the integral on the right hand side is integral of vector valued function over real number interval. This integral represents integrating the matrix values function along the line from  $a$  to  $b$ . Again, define error term

$$R^t = \sum_{i=1}^n \nabla f_{\sigma_t(i)}(x_{i-1}^t) - \sum_{i=1}^n \nabla f_{\sigma_t(i)}(x_0^t).$$

We have the following decomposition for the error term:

$$\begin{aligned} R^t &= \sum_{i=1}^n [\nabla f_{\sigma_t(i)}(x_{i-1}^t) - \nabla f_{\sigma_t(i)}(x_0^t)] \\ &= \sum_{i=1}^n \left[ \int_{x_0^t}^{x_{i-1}^t} H_{\sigma_t(i)}(x) dx \right] \\ &= \sum_{i=1}^n \left[ \int_{x_0^t}^{x_{i-1}^t} H_{\sigma_t(i)} dx \right] + \sum_{i=1}^n \left[ \int_{x_0^t}^{x_{i-1}^t} (H_{\sigma_t(i)}(x) - H_{\sigma_t(i)}) dx \right] \\ &= \sum_{i=1}^n [H_{\sigma_t(i)}(x_{i-1}^t - x_0^t)] + \sum_{i=1}^n \left[ \int_{x_0^t}^{x_{i-1}^t} (H_{\sigma_t(i)}(x) - H_{\sigma_t(i)}) dx \right] \\ &= \sum_{i=1}^n \left[ H_{\sigma_t(i)} \sum_{j=1}^{i-1} (-\gamma \nabla f_{\sigma_t(j)}(x_{j-1}^t)) \right] + \sum_{i=1}^n \left[ \int_{x_0^t}^{x_{i-1}^t} (H_{\sigma_t(i)}(x) - H_{\sigma_t(i)}) dx \right] \\ &= -\gamma \sum_{i=1}^n \left[ H_{\sigma_t(i)} \sum_{j=1}^{i-1} \nabla f_{\sigma_t(j)}(x_0^t) \right] - \gamma \sum_{i=1}^n \left\{ H_{\sigma_t(i)} \sum_{j=1}^{i-1} [\nabla f_{\sigma_t(j)}(x_{j-1}^t) - \nabla f_{\sigma_t(j)}(x_0^t)] \right\} \\ &\quad + \sum_{i=1}^n \left[ \int_{x_0^t}^{x_{i-1}^t} (H_{\sigma_t(i)}(x) - H_{\sigma_t(i)}) dx \right] \end{aligned}$$

$$= A^t + B^t + C^t. \quad (\text{B.1})$$

Here we define random variables

$$\begin{aligned} A^t &= -\gamma \sum_{i=1}^n \left[ H_{\sigma_t(i)} \sum_{j=1}^{i-1} \nabla f_{\sigma_t(j)}(x_0^t) \right], \\ B^t &= -\gamma \sum_{i=1}^n \left\{ H_{\sigma_t(i)} \sum_{j=1}^{i-1} [\nabla f_{\sigma_t(j)}(x_{j-1}^t) - \nabla f_{\sigma_t(j)}(x_0^t)] \right\}, \\ C^t &= \sum_{i=1}^n \left[ \int_{x_0^t}^{x_{i-1}^t} (H_{\sigma_t(i)}(x) - H_{\sigma_t(i)}) dx \right]. \end{aligned}$$

Compared with quadratic case,  $C^t$  is the new term capturing the difference introduced by a changing Hessian. There is

$$\mathbb{E}[A^t] = -\frac{n(n-1)}{2} \gamma \mathbb{E}_{i \neq j} [H_i \nabla f_j(x_0^t)], \quad (\text{B.2})$$

$$\begin{aligned} \|B^t\| &\leq \gamma \sum_{i=1}^n H_{\sigma_t(i)} \sum_{j=1}^{i-1} (\nabla f_{\sigma_t(j)}(x_{j-1}^t) - \nabla f_{\sigma_t(j)}(x_0^t)) \\ &\leq \gamma \sum_{i=1}^n L \sum_{j=1}^{i-1} (j-1) \gamma GL \\ &= \gamma^2 L^2 G \sum_{i=1}^n \frac{(i-1)(i-2)}{2} \\ &\leq \frac{1}{2} \gamma^2 L^2 G n^3. \end{aligned} \quad (\text{B.3})$$

$$\begin{aligned} \|C^t\| &\leq \sum_{i=1}^n \left[ \int_0^{\|x_{i-1}^t - x_0^t\|} \left\| H_{\sigma_t(i)} \left( a + t \frac{x_{i-1}^t - x_0^t}{\|x_{i-1}^t - x_0^t\|} \right) - H_{\sigma_t(i)} \right\| dt \right] \\ &\leq \sum_{i=1}^n [L_H \max\{\|x_{i-1}^t - x^*\|, \|x_0^t - x^*\|\} \|x_{i-1}^t - x_0^t\|] \\ &\leq n [(\|x_0^t - x^*\| + n\gamma G) L_H n \gamma G] \\ &= n^2 \gamma L_H G \|x_0^t - x^*\| + n^3 \gamma^2 L_H G^2. \end{aligned} \quad (\text{B.4})$$

Using (B.1) (B.2), we can decompose the innerproduct of  $x_0^t - x^*$  and  $\mathbb{E}[R^t]$  as following:

$$\begin{aligned} -2\gamma \langle x_0^t - x^*, \mathbb{E}[R^t] \rangle &= -2\gamma \langle x_0^t - x^*, \mathbb{E}[A^t] + \mathbb{E}[B^t] + \mathbb{E}[C^t] \rangle \\ &= -2\gamma \langle x_0^t - x^*, \mathbb{E}[A^t] \rangle - 2\gamma \langle x_0^t - x^*, \mathbb{E}[B^t] \rangle - 2\gamma \langle x_0^t - x^*, \mathbb{E}[C^t] \rangle \\ &= \gamma^2 n(n-1) \langle x_0^t - x^*, \mathbb{E}_{i \neq j} H_i \nabla f_j(x_0^t) \rangle - 2\gamma \langle x_0^t - x^*, \mathbb{E}[B^t] \rangle - 2\gamma \langle x_0^t - x^*, \mathbb{E}[C^t] \rangle. \end{aligned} \quad (\text{B.5})$$

For the first term in the (B.5), we have further bound:

$$\begin{aligned} &\gamma^2 n(n-1) \langle x_0^t - x^*, \mathbb{E}_{i \neq j} H_i \nabla f_j(x_0^t) \rangle \\ &= \gamma^2 n(n-1) \mathbb{E}_{i \neq j} \langle H_i(x_0^t - x^*), \nabla f_j(x_0^t) - \nabla f_j(x^*) \rangle + \gamma^2 n(n-1) \langle x_0^t - x^*, \mathbb{E}_{i \neq j} H_i \nabla f_j(x^*) \rangle \\ &\leq \gamma^2 n^2 \mathbb{E}_{i,j} \langle \nabla f_i(x_0^t) - \nabla f_i(x^*), \nabla f_j(x_0^t) - \nabla f_j(x^*) \rangle + \gamma^2 n(n-1) \left[ \frac{\lambda}{2} \|x_0^t - x^*\|^2 + \frac{1}{2\lambda} \|\Delta\|^2 \right] \\ &\quad + \gamma^2 n(n-1) \mathbb{E}_{i \neq j} \langle H_i(x_0^t - x^*) - (\nabla f_i(x_0^t) - \nabla f_i(x^*)), \nabla f_j(x_0^t) - \nabla f_j(x^*) \rangle \end{aligned}$$

$$\leq \gamma^2 n^2 \|\nabla F(x_0^t)\|^2 + \frac{1}{4} \gamma \mu (n-1) \|x_0^t - x^*\|^2 + \gamma^3 \mu^{-1} n^2 (n-1) \|\Delta\|^2 + \gamma^2 n (n-1) L_H L \|x_0^t - x^*\|^3. \quad (\text{B.6})$$

Note that here  $H_i(x_0^t - x^*)$  is the matrix  $H_i(x^*)$  times vector  $x_0^t - x^*$ , not the Hessian at point  $x_0^t - x^*$ . The last inequality is because of

$$\begin{aligned} \|H_i(x_0^t - x^*) - (\nabla f_i(x_0^t) - \nabla f_i(x^*))\| &= \left\| H_i(x_0^t - x^*) - \int_{x^*}^{x_0^t} H_i(x) dx \right\| \\ &= \left\| \int_{x^*}^{x_0^t} (H_i - H_i(x)) dx \right\| \\ &\leq \int_0^{\|x_0^t - x^*\|} \left\| H_i - H_i\left(x^* + t \frac{x_0^t - x^*}{\|x_0^t - x^*\|}\right) \right\| dt \\ &\leq L_H \|x_0^t - x^*\|^2. \end{aligned}$$

For the second term in (B.5), we use the bound

$$-2\gamma \langle x_0^t - x^*, \mathbb{E}[B^t] \rangle \leq \frac{1}{4} \gamma \mu (n-1) \|x_0^t - x^*\|^2 + 2\mu^{-1} \gamma^5 L^4 G^2 n^5. \quad (\text{B.7})$$

For the third term in (B.5), we use the bound

$$\begin{aligned} -2\gamma \langle x_0^t - x^*, \mathbb{E}[C^t] \rangle &\leq 2\gamma \|x_0^t - x^*\| \cdot (n^2 \gamma L_H G \|x_0^t - x^*\| + n^3 \gamma^2 L_H G^2) \\ &= 2n^2 \gamma^2 L_H G \|x_0^t - x^*\|^2 + \gamma^3 n^3 2 \|x_0^t - x^*\| L_H G^2 \\ &\leq 3n^2 \gamma^2 L_H G \|x_0^t - x^*\|^2 + \gamma^4 n^4 G^3 L_H. \end{aligned} \quad (\text{B.8})$$

Substituting (B.6) (B.7) (B.8) back to (B.5), we get

$$\begin{aligned} -2\gamma \langle x_0^t - x^*, \mathbb{E}[R^t] \rangle &\leq \gamma^2 n^2 \|\nabla F(x_0^t)\|^2 + \frac{1}{2} \gamma \mu n (n-1) \|x_0^t - x^*\|^2 + \gamma^3 \mu^{-1} n^2 (n-1) \|\Delta\|^2 \\ &\quad + 2\mu^{-1} \gamma^5 L^4 G^2 n^5 + \gamma^4 n^4 G^3 L_H + \gamma^2 n^2 (L_H L D + 3L_H G) \|x_0^t - x^*\|^2. \end{aligned} \quad (\text{B.9})$$

Substituting (B.9) to (A.2), for one epoch we get recursion bound:

$$\begin{aligned} &\mathbb{E} \|x_n^t - x^*\|^2 \\ &\leq \left( 1 - 2n\gamma \frac{L\mu}{L+\mu} + \frac{1}{2} \gamma \mu (n-1) + \gamma^2 n^2 (L_H L D + 3L_H G) \right) \|x_0^t - x^*\|^2 - \left( 2n\gamma \frac{1}{L+\mu} - 3\gamma^2 n^2 \right) \|\nabla F(x_0^t)\|^2 \\ &\quad + \gamma^3 \mu^{-1} n^2 (n-1) \|\Delta\|^2 + 2\mu^{-1} \gamma^5 L^4 G^2 n^5 + \gamma^4 n^4 G^3 L_H + \frac{1}{2} n^4 \gamma^4 G^2 L^2. \end{aligned} \quad (\text{B.10})$$

Now assume

$$\frac{3}{2} n\gamma \frac{L\mu}{L+\mu} > \frac{1}{2} \gamma \mu (n-1) + \gamma^2 n^2 (L_H L D + 3L_H G),$$

and

$$2n\gamma \frac{1}{L+\mu} - 3\gamma^2 n^2 > 0,$$

which we call assumption 1 and assumption 2, (B.10) can be further turned into:

$$\mathbb{E} \left[ \|x_n^t - x^*\|^2 \right] \leq \left( 1 - \frac{1}{2} n\gamma \frac{L\mu}{L+\mu} \right) \|x_0^t - x^*\|^2 + \gamma^3 n C_1 + \gamma^4 n^4 C_2 + \gamma^5 n^5 C_3, \quad (\text{B.11})$$

where  $C_1 = 2\mu^{-1} L^2 G^2$ ,  $C_2 = G^3 L_H + \frac{1}{2} G^2 L^2$ ,  $C_3 = 2\mu^{-1} L^4 G^2$ . Further assume  $n\gamma \frac{L\mu}{L+\mu} < 1$ , which we call assumption 3, expanding (B.11) over all the epochs we finally get a bound for RANDOMSHUFFLE:

$$\mathbb{E} \|x_T - x^*\|^2 \leq \left( 1 - \frac{1}{2} n\gamma \frac{L\mu}{L+\mu} \right)^{\frac{T}{n}} \|x_0 - x^*\|^2 + \frac{T}{n} (\gamma^3 n C_1 + \gamma^4 n^4 C_2 + \gamma^5 n^5 C_3).$$

Let  $\gamma = \frac{8 \log T}{T\mu}$ , there is

$$\begin{aligned} \mathbb{E} \|x_T - x^*\|^2 &\leq \left(1 - \frac{2n \log T}{T}\right)^{\frac{T}{2n \log T} 2 \log T} \|x_0 - x^*\|^2 + \frac{T}{n} (\gamma^3 n C_1 + \gamma^4 n^4 C_2 + \gamma^5 n^5 C_3) \\ &\leq \frac{1}{T^2} \|x_0 - x^*\|^2 + \frac{1}{T^2} (\log T)^3 C_4 + \frac{n^3}{T^3} (\log T)^4 C_5 + \frac{n^4}{T^4} (\log T)^5 C_6, \end{aligned} \quad (\text{B.12})$$

where  $C_4 = \frac{512C_1}{\mu^3}$ ,  $C_5 = \frac{4096C_2}{\mu^4}$ ,  $C_6 = \frac{8^5 C_3}{\mu^5}$ . The second inequality comes from  $(1-x)^{\frac{1}{x}} \leq \frac{1}{e}$  for  $0 < x < 1$ . Obviously, this is a result of the form  $\mathcal{O}\left(\frac{1}{T^2} + \frac{n^3}{T^3}\right)$ .

What remains to determine is to satisfy the three assumptions: (1)  $\frac{3}{2}n\gamma\frac{L\mu}{L+\mu} > \frac{1}{2}\gamma\mu(n-1) + \gamma^2n^2(L_HLD + 3L_HG)$ , (2)  $2n\gamma\frac{1}{L+\mu} - 3\gamma^2n^2 > 0$ , and (3)  $n\gamma\frac{L\mu}{L+\mu} < 1$ . The first is satisfied when

$$n\gamma\frac{L\mu}{L+\mu} > \frac{1}{2}\gamma\mu(n-1),$$

which is naturally satisfied and

$$\frac{1}{2}n\gamma\frac{L\mu}{L+\mu} > \gamma^2n^2(L_HLD + 3L_HG),$$

which is equivalent to

$$\frac{T}{\log T} > 16\frac{L+\mu}{L\mu^2}(L_HLD + 3L_HG)n,$$

which is obviously satisfied if we assume

$$\frac{T}{\log T} > \frac{32}{\mu^2}(L_HLD + 3L_HG)n.$$

The second assumption is equivalent to

$$\frac{T}{\log T} > 12\left(1 + \frac{L}{\mu}\right)n.$$

Assumption 3 is equivalent to

$$\frac{T}{\log T} > \frac{8L}{L+\mu}n,$$

which is satisfied when

$$\frac{T}{\log T} > 8n.$$

Since  $12\left(1 + \frac{L}{\mu}\right) > 8$ , we only need

$$\frac{T}{\log T} > \max\left\{\frac{32}{\mu^2}(L_HLD + 3L_HG)n, 12\left(1 + \frac{L}{\mu}\right)n\right\}.$$

So whenever  $\frac{T}{\log T} > \max\left\{\frac{32}{\mu^2}(L_HLD + 3L_HG), 12\left(1 + \frac{L}{\mu}\right)\right\}n$ , the three assumptions hold. Therefore the theorem is proved.  $\square$

### C. Proof of Theorem 3

*Proof.* We only need to show that when  $T = n$  (i.e., one epoch is run for each problem) and  $n$  is even, no such step size schedule exists. We note the random permutation of this single epoch as  $\sigma(\cdot)$ . For  $n$  even, consider the following quadratic problem:

$$F(x) = \frac{1}{n} \sum_{i=1}^n f_i(x),$$



where

$$f_i(x) = \begin{cases} \frac{1}{2}(x-b)'A(x-b) & i \text{ odd}, \\ \frac{1}{2}(x+b)'A(x+b) & i \text{ even}, \end{cases}$$

where  $A$  is some  $d \times d$  positive definite matrix with minimal eigenvalue  $\mu$  and maximal eigenvalue  $L$ ,  $b$  is a  $d$  dimensional vector. We use  $(\cdot)'$  to notate the transpose, so as to distinguish from exponential  $T$ . The exact value of  $A$  and  $b$  will be determined later. Obviously,  $x^* = 0$  is the minimizer. In this setting, we have:

$$\begin{aligned} x_t &= x_{t-1} - \gamma A(x_{t-1} + (-1)^{\sigma(t)}b) \\ &= (I - \gamma A)x_{t-1} - (-1)^{\sigma(t)}\gamma Ab. \end{aligned} \tag{C.1}$$

Expanding (C.1) over iterations leads to:

$$x_T = (I - \gamma A)^T x_0 - \sum_{t=1}^T (-1)^{\sigma(t)}\gamma(I - \gamma A)^{T-t}Ab. \tag{C.2}$$

Taking expectation of (C.2) over the randomness of  $\sigma$ , there is

$$\mathbb{E}[x_T] = (I - \gamma A)^T x_0. \tag{C.3}$$

With (C.2) (C.3), we have close-formed expression on the final error:

$$\begin{aligned} \mathbb{E}[\|x_T - x^*\|^2] &= \|\mathbb{E}[x_T] - x^*\|^2 + \mathbb{E}[\|x_T - \mathbb{E}[x_T]\|^2] \\ &= \|(I - \gamma A)^T(x_0 - x^*)\|^2 + \mathbb{E}\left[\left\|\sum_{t=1}^T (-1)^{\sigma(t)}\gamma(I - \gamma A)^{T-t}Ab\right\|^2\right]. \end{aligned} \tag{C.4}$$

Assume the eigenvalues of  $A$  are  $\lambda_1, \lambda_2, \dots, \lambda_d$ , there is an orthogonal basis  $e_1, \dots, e_d$  for  $\mathbb{R}^d$  such that  $e_k$  is eigenvector of  $A$  with eigenvalue  $\lambda_k$ . We can write

$$b = \sum_{i=1}^d b_i e_i.$$

Since  $\langle e_i, e_j \rangle = 0$  for  $i \neq j$ , we can simplify the last term in (C.4):

$$\begin{aligned} \left\|\sum_{t=1}^T (-1)^{\sigma(t)}\gamma(I - \gamma A)^{T-t}Ab\right\|^2 &= \left\|\sum_{t=1}^T (-1)^{\sigma(t)}\gamma(I - \gamma A)^{T-t}A\left(\sum_{i=1}^d b_i e_i\right)\right\|^2 \\ &= \left\|\sum_{i=1}^d \left[\sum_{t=1}^T (-1)^{\sigma(t)}\gamma(I - \gamma A)^{T-t}A(b_i e_i)\right]\right\|^2 \\ &= \left\|\sum_{i=1}^d \left[\sum_{t=1}^T (-1)^{\sigma(t)}\gamma(1 - \gamma\lambda_i)^{T-t}\lambda_i(b_i e_i)\right]\right\|^2 \\ &= \sum_{i=1}^d \left[\sum_{t=1}^T (-1)^{\sigma(t)}\gamma(1 - \gamma\lambda_i)^{T-t}\lambda_i b_i\right]^2 \\ &= \gamma^2 \sum_{i=1}^d b_i^2 \lambda_i^2 \left[\sum_{t=1}^T (-1)^{\sigma(t)}(1 - \gamma\lambda_i)^{T-t}\right]^2. \end{aligned} \tag{C.5}$$

Substituting (C.5) to (C.4), we have

$$\mathbb{E} \left[ \|x_T - x^*\|^2 \right] = \|(I - \gamma A)^T (x_0 - x^*)\|^2 + \gamma^2 \sum_{i=1}^d b_i^2 \lambda_i^2 \mathbb{E} \left[ \left[ \sum_{t=1}^T (-1)^{\sigma(t)} (1 - \gamma \lambda_i)^{T-t} \right]^2 \right] \quad (\text{C.6})$$

Once again, we can write

$$x_0 - x^* = \sum_{i=1}^d a_i e_i.$$

Then (C.6) can be simplified as

$$\mathbb{E} \left[ \|x_T - x^*\|^2 \right] = \sum_{i=1}^d (1 - \gamma \lambda_i)^{2T} a_i^2 + \gamma^2 \sum_{i=1}^d b_i^2 \lambda_i^2 \mathbb{E} \left[ \left[ \sum_{t=1}^T (-1)^{\sigma(t)} (1 - \gamma \lambda_i)^{T-t} \right]^2 \right] \quad (\text{C.7})$$

Define random variables  $s_t = (-1)^{\sigma(t)}$  for  $t = 1, \dots, T$ . Then for any index pair  $t \neq u$ , over randomness of  $\sigma$ , there is

$$\begin{aligned} \mathbb{E} [s_t s_u] &= \frac{2^{\binom{T}{2} \binom{T}{2} - 1}}{T(T-1)} - \frac{\binom{T}{2} \binom{T}{2}}{T(T-1)} \\ &= -\frac{1}{T-1}. \end{aligned}$$

Using this fact, we can simplify the last term in (C.7) as:

$$\begin{aligned} \mathbb{E} \left[ \left[ \sum_{t=1}^T (-1)^{\sigma(t)} (1 - \gamma \lambda_i)^{T-t} \right]^2 \right] &= \sum_{t=1}^T (1 - \gamma \lambda_i)^{2(T-t)} + \sum_{t \neq u} (1 - \gamma \lambda_i)^{2T-t-u} \mathbb{E} [s_t s_u] \\ &= \sum_{t=0}^{T-1} (1 - \gamma \lambda_i)^{2t} - \frac{1}{T-1} \sum_{t=0}^{T-1} \sum_{u=0, u \neq t}^{T-1} (1 - \gamma \lambda_i)^{t+u} \\ &= \sum_{t=0}^{T-1} (1 - \gamma \lambda_i)^{2t} + \frac{1}{T-1} \sum_{t=0}^{T-1} (1 - \gamma \lambda_i)^{2t} - \frac{1}{T-1} \left[ \sum_{t=0}^{T-1} (1 - \gamma \lambda_i)^t \right]^2 \\ &= \frac{T}{T-1} \frac{1 - (1 - \gamma \lambda_i)^{2T}}{1 - (1 - \gamma \lambda_i)^2} - \frac{1}{T-1} \left[ \frac{1 - (1 - \gamma \lambda_i)^T}{\gamma \lambda_i} \right]^2. \end{aligned} \quad (\text{C.8})$$

For contradiction, we assume for any  $T$ , there is a  $\gamma$  dependent on  $T$  such that

$$\mathbb{E} \left[ \|x_T - x^*\|^2 \right] \leq o(1/T). \quad (\text{C.9})$$

Now we determine the specific requirement of  $A$  and  $b$ . The only requirement is:  $A$  has at least three different positive eigenvalues  $\lambda_1 > \lambda_2 > \lambda_3$ , and  $b_i \neq 0$  for any  $i$ . Furthermore, we assume  $a_i \neq 0$  for any  $i$ . Now for the faster convergence rate (C.9) to hold, from (C.7) we know there must be

$$(1 - \gamma \lambda_i)^{2T} = o\left(\frac{1}{T}\right), \quad (\text{C.10})$$

$$\gamma^2 \mathbb{E} \left[ \left[ \sum_{t=1}^T (-1)^{\sigma(t)} (1 - \gamma \lambda_i)^{T-t} \right]^2 \right] = o\left(\frac{1}{T}\right), \quad (\text{C.11})$$

hold for any  $i$ .

However with (C.8), we know:

$$\begin{aligned}
 & \gamma^2 \mathbb{E} \left[ \left[ \sum_{t=1}^T (-1)^{\sigma(t)} (1 - \gamma\lambda_i)^{T-t} \right]^2 \right] \\
 &= \gamma^2 \left\{ \frac{T}{T-1} \frac{1 - (1 - \gamma\lambda_i)^{2T}}{1 - (1 - \gamma\lambda_i)^2} - \frac{1}{T-1} \left[ \frac{1 - (1 - \gamma\lambda_i)^T}{\gamma\lambda_i} \right]^2 \right\} \\
 &= \gamma^2 \left[ \frac{T}{T-1} \frac{1}{1 - (1 - \gamma\lambda_i)^2} - \frac{1}{T-1} \frac{1}{\gamma^2 \lambda_i^2} \right] + \gamma^2 \left[ \frac{T}{T-1} \frac{(1 - \gamma\lambda_i)^{2T}}{1 - (1 - \gamma\lambda_i)^2} - \frac{1}{T-1} \frac{-2(1 - \gamma\lambda_i)^T + (1 - \gamma\lambda_i)^{2T}}{\gamma^2 \lambda_i^2} \right]. \tag{C.12}
 \end{aligned}$$

So by (C.11), there must be (C.12) is  $o(\frac{1}{T})$ . We now analyze the terms in (C.12). There must be  $|1 - \gamma\lambda_1| < 1$  for convergence, so  $|\gamma|$  is no more than  $\frac{2}{\lambda_1}$  which is constant. Since (C.10), there is  $(1 - \gamma\lambda_i)^T = o(1)$ , so

$$\gamma^2 \left[ -\frac{1}{T-1} \frac{-2(1 - \gamma\lambda_i)^T + (1 - \gamma\lambda_i)^{2T}}{\gamma^2 \lambda_i^2} \right] = o\left(\frac{1}{T}\right).$$

Again, since  $|1 - \gamma\lambda_1| < 1$ , for  $i = 2, 3$  there is

$$\left| \frac{\gamma^2}{2\gamma\lambda_i - \gamma^2\lambda_i^2} \right| \leq \frac{\frac{2}{\lambda_1}}{(2 - \frac{2\lambda_i}{\lambda_1})\lambda_i}$$

which is constant. Therefore by (C.10),

$$\gamma^2 \left[ \frac{T}{T-1} \frac{(1 - \gamma\lambda_i)^{2T}}{1 - (1 - \gamma\lambda_i)^2} \right] = o\left(\frac{1}{T}\right)$$

for  $i = 2, 3$ . So for what remains in (C.12),

$$\gamma^2 \left[ \frac{T}{T-1} \frac{(1 - \gamma\lambda_i)^{2T}}{1 - (1 - \gamma\lambda_i)^2} - \frac{1}{T-1} \frac{-2(1 - \gamma\lambda_i)^T + (1 - \gamma\lambda_i)^{2T}}{\gamma^2 \lambda_i^2} \right] = o\left(\frac{1}{T}\right)$$

for  $i = 2, 3$ . Therefore,

$$\gamma^2 \left[ \frac{T}{T-1} \frac{1}{1 - (1 - \gamma\lambda_i)^2} - \frac{1}{T-1} \frac{1}{\gamma^2 \lambda_i^2} \right] = o\left(\frac{1}{T}\right),$$

so

$$\gamma \frac{T}{T-1} \frac{1}{\lambda_i(2 - \gamma\lambda_i)} = \frac{1}{T-1} \frac{1}{\lambda_i^2} + o\left(\frac{1}{T}\right),$$

which means

$$\frac{\gamma T}{2 - \gamma\lambda_i} = \frac{1}{\lambda_i} + o(1).$$

Since  $2 - \frac{2}{\lambda_1}\lambda_i \leq 2 - \gamma\lambda_i \leq 2$  for  $i = 2, 3$ , there must be

$$\sup \lim_{T \rightarrow \infty} \gamma T < C$$

for some  $C > 0$ , so  $\gamma \rightarrow 0$  as  $T \rightarrow \infty$ . Therefore,  $(2 - \gamma\lambda_i) \rightarrow 2$ . So there has to be

$$\lim_{T \rightarrow \infty} \gamma T = \frac{2}{\lambda_i}.$$

However, this cannot be true for  $\lambda_2 \neq \lambda_3$  at the same time, contradiction. As a result, no step size can leads to convergence of  $o(\frac{1}{T})$ .  $\square$

## D. Proof of Theorem 4

*Proof.* The idea is similar to the proof of Theorem 2, with a slightly different analysis on the  $R^t$  term adopting the sparsity parameter. For any  $i$ , we use  $H_i$  to denote  $H_i(x^*)$ . Again, we have the following decomposition for the error term:

$$\begin{aligned}
 R^t &= \sum_{i=1}^n [\nabla f_{\sigma_t(i)}(x_{i-1}^t) - \nabla f_{\sigma_t(i)}(x_0^t)] \\
 &= \sum_{i=1}^n \left[ \int_{x_0^t}^{x_{i-1}^t} H_{\sigma_t(i)}(x) dx \right] \\
 &= \sum_{i=1}^n \left[ \int_{x_0^t}^{x_{i-1}^t} H_{\sigma_t(i)} dx \right] + \sum_{i=1}^n \left[ \int_{x_0^t}^{x_{i-1}^t} (H_{\sigma_t(i)}(x) - H_{\sigma_t(i)}) dx \right] \\
 &= \sum_{i=1}^n [H_{\sigma_t(i)}(x_{i-1}^t - x_0^t)] + \sum_{i=1}^n \left[ \int_{x_0^t}^{x_{i-1}^t} (H_{\sigma_t(i)}(x) - H_{\sigma_t(i)}) dx \right] \\
 &= \sum_{i=1}^n \left[ H_{\sigma_t(i)} \sum_{j=1}^{i-1} (-\gamma \nabla f_{\sigma_t(j)}(x_{j-1}^t)) \right] + \sum_{i=1}^n \left[ \int_{x_0^t}^{x_{i-1}^t} (H_{\sigma_t(i)}(x) - H_{\sigma_t(i)}) dx \right] \\
 &= -\gamma \sum_{i=1}^n \left[ H_{\sigma_t(i)} \sum_{j=1}^{i-1} \nabla f_{\sigma_t(j)}(x_0^t) \right] - \gamma \sum_{i=1}^n \left\{ H_{\sigma_t(i)} \sum_{j=1}^{i-1} [\nabla f_{\sigma_t(j)}(x_{j-1}^t) - \nabla f_{\sigma_t(j)}(x_0^t)] \right\} \\
 &\quad + \sum_{i=1}^n \left[ \int_{x_0^t}^{x_{i-1}^t} (H_{\sigma_t(i)}(x) - H_{\sigma_t(i)}) dx \right] \\
 &= A^t + B^t + C^t.
 \end{aligned} \tag{D.1}$$

Here we define random variables

$$\begin{aligned}
 A^t &= -\gamma \sum_{i=1}^n \left[ H_{\sigma_t(i)} \sum_{j=1}^{i-1} \nabla f_{\sigma_t(j)}(x_0^t) \right], \\
 B^t &= -\gamma \sum_{i=1}^n \left\{ H_{\sigma_t(i)} \sum_{j=1}^{i-1} [\nabla f_{\sigma_t(j)}(x_{j-1}^t) - \nabla f_{\sigma_t(j)}(x_0^t)] \right\}, \\
 C^t &= \sum_{i=1}^n \left[ \int_{x_0^t}^{x_{i-1}^t} (H_{\sigma_t(i)}(x) - H_{\sigma_t(i)}) dx \right].
 \end{aligned}$$

This time, we have bounds for these three terms adopting sparsity information:

$$\mathbb{E}[A^t] = -\frac{n(n-1)}{2} \gamma \mathbb{E}_{i \neq j} [H_{\sigma_t(i)} \nabla f_{\sigma_t(j)}(x_0^t)], \tag{D.2}$$

$$\begin{aligned}
 \|B^t\| &\leq \gamma \sum_{i=1}^n H_{\sigma_t(i)} \sum_{j=1}^{i-1} (\nabla f_{\sigma_t(j)}(x_{j-1}^t) - \nabla f_{\sigma_t(j)}(x_0^t)) \\
 &\leq \gamma \sum_{i=1}^n L \sum_{j=1}^{i-1} \rho n \gamma GL \\
 &\leq n^3 \gamma^2 \rho GL^2.
 \end{aligned} \tag{D.3}$$

$$\|C^t\| \leq \sum_{i=1}^n \sum_{j=1}^{i-1} \left\| \int_{x_{j-1}^t}^{x_j^t} (H_{\sigma_t(i)}(x) - H_{\sigma_t(i)}) dx \right\|$$

$$\begin{aligned}
 &\leq \sum_{i=1}^n \rho n [\max \{ \|x_j^t - x^*\| \mid 0 \leq j \leq i-1 \} L_H \gamma G] \\
 &\leq \rho n^2 [(\|x_0^t - x^*\| + n\gamma G) L_H \gamma G] \\
 &= \rho n^2 \gamma L_H G \|x_0^t - x^*\| + \rho n^3 \gamma^2 L_H G^2.
 \end{aligned} \tag{D.4}$$

Here the introduction of  $\rho$  in (D.3) is because: if  $f_{\sigma_t(k)}$  and  $f_{\sigma_t(j)}$  depend on disjoint dimensions of variables and  $k < j$ , then there must be  $\nabla f_{\sigma_t(j)}(x_k^t) = \nabla f_{\sigma_t(j)}(x_{k-1}^t)$ . The introduction of  $\rho$  in (D.4) is similar: if  $f_{\sigma_t(i)}$  and  $f_{\sigma_t(j)}$  depend on disjoint dimensions of variables and  $j < i$ , then there must be  $\int_{x_{j-1}^t}^{x_j^t} (H_{\sigma_t(i)}(x) - H_{\sigma_t(i)}) dx = 0$ .

With (D.1) (D.2), we can decompose the innerproduct of  $x_0^t - x^*$  and  $\mathbb{E}[R^t]$  into:

$$\begin{aligned}
 -2\gamma \langle x_0^t - x^*, \mathbb{E}[R^t] \rangle &= -2\gamma \langle x_0^t - x^*, \mathbb{E}[A^t] + \mathbb{E}[B^t] + \mathbb{E}[C^t] \rangle \\
 &= -2\gamma \langle x_0^t - x^*, \mathbb{E}[A^t] \rangle - 2\gamma \langle x_0^t - x^*, \mathbb{E}[B^t] \rangle - 2\gamma \langle x_0^t - x^*, \mathbb{E}[C^t] \rangle \\
 &= \gamma^2 n(n-1) \langle x_0^t - x^*, \mathbb{E}_{i \neq j} H_i \nabla f_j(x_0^t) \rangle - 2\gamma \langle x_0^t - x^*, \mathbb{E}[B^t] \rangle - 2\gamma \langle x_0^t - x^*, \mathbb{E}[C^t] \rangle.
 \end{aligned} \tag{D.5}$$

For the first term in the (D.5), there is

$$\begin{aligned}
 &\gamma^2 n(n-1) \langle x_0^t - x^*, \mathbb{E}_{i \neq j} H_i \nabla f_j(x_0^t) \rangle \\
 &= \gamma^2 n(n-1) \mathbb{E}_{i \neq j} \langle H_i(x_0^t - x^*), \nabla f_j(x_0^t) - \nabla f_j(x^*) \rangle + \gamma^2 n(n-1) \langle x_0^t - x^*, \mathbb{E}_{i \neq j} H_i \nabla f_j(x^*) \rangle \\
 &\leq \gamma^2 n^2 \mathbb{E}_{i,j} \langle \nabla f_i(x_0^t) - \nabla f_i(x^*), \nabla f_j(x_0^t) - \nabla f_j(x^*) \rangle + \gamma^2 n(n-1) \left[ \frac{\lambda}{2} \|x_0^t - x^*\|^2 + \frac{1}{2\lambda} \|\Delta\|^2 \right] \\
 &\quad + \gamma^2 n(n-1) \mathbb{E}_{i \neq j} \langle H_i(x_0^t - x^*) - (\nabla f_i(x_0^t) - \nabla f_i(x^*)), \nabla f_j(x_0^t) - \nabla f_j(x^*) \rangle \\
 &\leq \gamma^2 n^2 \|\nabla F(x_0^t)\|^2 + \frac{1}{4} \gamma \mu (n-1) \|x_0^t - x^*\|^2 + \gamma^3 \mu^{-1} n^2 (n-1) \|\Delta\|^2 + \gamma^2 n(n-1) L_H L \|x_0^t - x^*\|^3.
 \end{aligned} \tag{D.6}$$

Where the last inequality is because of

$$\begin{aligned}
 \|H_i(x_0^t - x^*) - (\nabla f_i(x_0^t) - \nabla f_i(x^*))\| &= \left\| H_i(x_0^t - x^*) - \int_{x^*}^{x_0^t} H_i(x) dx \right\| \\
 &= \left\| \int_{x^*}^{x_0^t} (H_i - H_i(x)) dx \right\| \\
 &\leq \int_0^{\|x_0^t - x^*\|} \left\| H_i - H_i \left( x^* + t \frac{x_0^t - x^*}{\|x_0^t - x^*\|} \right) \right\| dt \\
 &\leq L_H \|x_0^t - x^*\|^2.
 \end{aligned}$$

For the second term in (D.5), we use the bound

$$-2\gamma \langle x_0^t - x^*, \mathbb{E}[B^t] \rangle \leq \frac{1}{4} \gamma \mu (n-1) \|x_0^t - x^*\|^2 + 2\mu^{-1} \gamma^5 \rho^2 L^4 G^2 n^5. \tag{D.7}$$

For the third term in (D.5), we use the bound

$$\begin{aligned}
 -2\gamma \langle x_0^t - x^*, \mathbb{E}[C^t] \rangle &\leq 2\gamma \|x_0^t - x^*\| \cdot (\rho n^2 \gamma L_H G \|x_0^t - x^*\| + \rho n^3 \gamma^2 L_H G^2) \\
 &= 2n^2 \rho \gamma^2 L_H G \|x_0^t - x^*\|^2 + \rho \gamma^3 n^3 2 \|x_0^t - x^*\| L_H G^2 \\
 &\leq (2\rho + 1) n^2 \gamma^2 L_H G \|x_0^t - x^*\|^2 + \rho^2 \gamma^4 n^4 G^3 L_H \\
 &\leq 3n^2 \gamma^2 L_H G \|x_0^t - x^*\|^2 + \rho^2 \gamma^4 n^4 G^3 L_H.
 \end{aligned} \tag{D.8}$$

Substituting (D.6) (D.7) (D.8) back to (D.5), we get

$$-2\gamma \langle x_0^t - x^*, \mathbb{E}[R^t] \rangle \leq \gamma^2 n^2 \|\nabla F(x_0^t)\|^2 + \frac{1}{2} \gamma \mu (n-1) \|x_0^t - x^*\|^2 + \gamma^3 \mu^{-1} n^2 (n-1) \|\Delta\|^2$$

$$+ 2\mu^{-1}\gamma^5\rho^2L^4G^2n^5 + \rho^2\gamma^4n^4G^3L_H + \gamma^2n^2(L_HLD + 3L_HG) \|x_0^t - x^*\|^2. \quad (\text{D.9})$$

Substituting (D.9) to (A.2), we have recursion bound for one epoch:

$$\begin{aligned} & \mathbb{E} \|x_n^t - x^*\|^2 \\ & \leq (1 - 2n\gamma \frac{L\mu}{L+\mu} + \frac{1}{2}\gamma\mu(n-1) + \gamma^2n^2(L_HLD + 3L_HG)) \|x_0^t - x^*\|^2 - (2n\gamma \frac{1}{L+\mu} - 3\gamma^2n^2) \|\nabla F(x_0^t)\|^2 \\ & \quad + \gamma^3\mu^{-1}n^2(n-1) \|\Delta\|^2 + \rho^2\gamma^4n^4G^3L_H + 2\mu^{-1}\gamma^5\rho^2L^4G^2n^5 + 2\rho^2n^4\gamma^4G^2L^2. \end{aligned}$$

Here the last inequality is because

$$\begin{aligned} \|R^t\| &= \left\| \sum_{i=1}^n \nabla f_{\sigma_t(i)}(x_{i-1}^t) - \sum_{i=1}^n \nabla f_{\sigma_t(i)}(x_0^t) \right\| \\ &\leq \sum_{i=1}^n \|\nabla f_{\sigma_t(i)}(x_{i-1}^t) - \nabla f_{\sigma_t(i)}(x_0^t)\| \\ &= \sum_{i=1}^n \left\| \sum_{j=1}^{i-1} (\nabla f_{\sigma_t(i)}(x_j^t) - \nabla f_{\sigma_t(i)}(x_{j-1}^t)) \right\| \\ &\leq \sum_{i=1}^n \sum_{j=1}^{i-1} \|\nabla f_{\sigma_t(i)}(x_j^t) - \nabla f_{\sigma_t(i)}(x_{j-1}^t)\| \\ &\leq n^2\rho L\gamma G. \end{aligned}$$

Finally, we again use the fact

$$\|\Delta\| \leq \frac{1}{n-1} LG.$$

The remaining process is same as proof of Theorem 2, leading to a bound  $\mathcal{O}(\frac{1}{T^2} + \frac{\rho^2n^3}{T^3})$ .

□

## E. Proof of Theorem 5

*Proof.* The idea is similar to the proof of Theorem 2. For any vector  $v$  not being zero, define vector value directional function

$$dir(v) = \frac{v}{\|v\|},$$

with norm being  $\ell_2$  norm. For the convenience of notation, we define  $dir(\vec{0}) = \vec{0}$ , where  $\vec{0}$  is the zero vector. For any two points  $a, b \in \mathbb{R}^d$ , and a matrix function  $g(\cdot) : \mathbb{R}^d \rightarrow \mathbb{R}^{d \times d}$ , define line integral:

$$\int_a^b g(x) dx := \int_0^{\|b-a\|} g\left(a + t \frac{b-a}{\|b-a\|}\right) dir(b-a) dt,$$

where the integral on the right hand side is integral of vector valued function over real number interval. This integral represents integrating the matrix values function along the line from  $a$  to  $b$ . Again, define error term

$$R^t = \sum_{i=1}^n \nabla f_{\sigma_t(i)}(x_{i-1}^t) - \sum_{i=1}^n \nabla f_{\sigma_t(i)}(x_0^t).$$

Assume  $F^*$  being the minimum of function  $F(\cdot)$ . For one epoch of RANDOMSHUFFLE, we have

$$F(x_0^{t+1}) - F^* \leq F(x_0^t) - F^* - \gamma \langle \nabla F(x_0^t), n\nabla F(x_0^t) + R^t \rangle + \frac{L}{2} \gamma^2 \|n\nabla F(x_0^t) + R^t\|^2$$

$$\begin{aligned}
 &\leq (1 - 2n\mu\gamma) [F(x_0^t) - F^*] - \gamma \langle \nabla F(x_0^t), R^t \rangle + \frac{L}{2} \gamma^2 [2n^2 \|\nabla F(x_0^t)\|^2 + 2\|R^t\|^2] \\
 &\leq (1 - 2n\mu\gamma + 2L^2 n^2 \gamma^2) [F(x_0^t) - F^*] - \gamma \langle \nabla F(x_0^t), R^t \rangle + L\gamma^2 \|R^t\|^2.
 \end{aligned} \tag{E.1}$$

Here the second inequality is by the definition of Polyak-Łojasiewicz condition, the last inequality uses the fact

$$2L[F(x_0^t) - F^*] \geq \|\nabla F(x_0^t)\|^2.$$

We have the following decomposition for the error term:

$$\begin{aligned}
 R^t &= \sum_{i=1}^n [\nabla f_{\sigma_t(i)}(x_{i-1}^t) - \nabla f_{\sigma_t(i)}(x_0^t)] \\
 &= \sum_{i=1}^n \left[ \int_{x_0^t}^{x_{i-1}^t} H_{\sigma_t(i)}(x) dx \right] \\
 &= \sum_{i=1}^n \left[ \int_{x_0^t}^{x_{i-1}^t} H_{\sigma_t(i)}(x_0^t) dx \right] + \sum_{i=1}^n \left[ \int_{x_0^t}^{x_{i-1}^t} (H_{\sigma_t(i)}(x) - H_{\sigma_t(i)}(x_0^t)) dx \right] \\
 &= \sum_{i=1}^n [H_{\sigma_t(i)}(x_0^t) (x_{i-1}^t - x_0^t)] + \sum_{i=1}^n \left[ \int_{x_0^t}^{x_{i-1}^t} (H_{\sigma_t(i)}(x) - H_{\sigma_t(i)}(x_0^t)) dx \right] \\
 &= \sum_{i=1}^n \left[ H_{\sigma_t(i)}(x_0^t) \sum_{j=1}^{i-1} (-\gamma \nabla f_{\sigma_t(j)}(x_{j-1}^t)) \right] + \sum_{i=1}^n \left[ \int_{x_0^t}^{x_{i-1}^t} (H_{\sigma_t(i)}(x) - H_{\sigma_t(i)}(x_0^t)) dx \right] \\
 &= -\gamma \sum_{i=1}^n \left[ H_{\sigma_t(i)}(x_0^t) \sum_{j=1}^{i-1} \nabla f_{\sigma_t(j)}(x_0^t) \right] - \gamma \sum_{i=1}^n \left\{ H_{\sigma_t(i)}(x_0^t) \sum_{j=1}^{i-1} [\nabla f_{\sigma_t(j)}(x_{j-1}^t) - \nabla f_{\sigma_t(j)}(x_0^t)] \right\} \\
 &\quad + \sum_{i=1}^n \left[ \int_{x_0^t}^{x_{i-1}^t} (H_{\sigma_t(i)}(x) - H_{\sigma_t(i)}(x_0^t)) dx \right] \\
 &= A^t + B^t + C^t.
 \end{aligned} \tag{E.2}$$

Here we define random variables

$$\begin{aligned}
 A^t &= -\gamma \sum_{i=1}^n \left[ H_{\sigma_t(i)}(x_0^t) \sum_{j=1}^{i-1} \nabla f_{\sigma_t(j)}(x_0^t) \right], \\
 B^t &= -\gamma \sum_{i=1}^n \left\{ H_{\sigma_t(i)}(x_0^t) \sum_{j=1}^{i-1} [\nabla f_{\sigma_t(j)}(x_{j-1}^t) - \nabla f_{\sigma_t(j)}(x_0^t)] \right\}, \\
 C^t &= \sum_{i=1}^n \left[ \int_{x_0^t}^{x_{i-1}^t} (H_{\sigma_t(i)}(x) - H_{\sigma_t(i)}(x_0^t)) dx \right].
 \end{aligned}$$

There is

$$\mathbb{E}[A^t] = -\frac{n(n-1)}{2} \gamma \mathbb{E}_{i \neq j} [H_i(x_0^t) \nabla f_j(x_0^t)], \tag{E.3}$$

$$\begin{aligned}
 \|B^t\| &\leq \gamma \sum_{i=1}^n H_{\sigma_t(i)}(x_0^t) \sum_{j=1}^{i-1} (\nabla f_{\sigma_t(j)}(x_{j-1}^t) - \nabla f_{\sigma_t(j)}(x_0^t)) \\
 &\leq \gamma \sum_{i=1}^n L \sum_{j=1}^{i-1} (j-1) \gamma GL
 \end{aligned}$$

$$\begin{aligned}
 &= \gamma^2 L^2 G \sum_{i=1}^n \frac{(i-1)(i-2)}{2} \\
 &\leq \frac{1}{2} \gamma^2 L^2 G n^3.
 \end{aligned} \tag{E.4}$$

$$\begin{aligned}
 \|C^t\| &\leq \sum_{i=1}^n \left[ \int_0^{\|x_{i-1}^t - x_0^t\|} \left\| H_{\sigma_t(i)} \left( x_0^t + t \frac{x_{i-1}^t - x_0^t}{\|x_{i-1}^t - x_0^t\|} \right) - H_{\sigma_t(i)}(x_0^t) \right\| dt \right] \\
 &\leq \sum_{i=1}^n \left[ L_H \|x_{i-1}^t - x_0^t\|^2 \right] \\
 &\leq n^3 \gamma^2 L_H G^2.
 \end{aligned} \tag{E.5}$$

Using (E.2) (E.3), we can decompose the innerproduct of  $\nabla F(x_0^t)$  and  $\mathbb{E}[R^t]$  as following:

$$\begin{aligned}
 -\gamma \langle \nabla F(x_0^t), \mathbb{E}[R^t] \rangle &= -\gamma \langle \nabla F(x_0^t), \mathbb{E}[A^t] + \mathbb{E}[B^t] + \mathbb{E}[C^t] \rangle \\
 &= -\gamma \langle \nabla F(x_0^t), \mathbb{E}[A^t] \rangle - \gamma \langle \nabla F(x_0^t), \mathbb{E}[B^t] \rangle - \gamma \langle \nabla F(x_0^t), \mathbb{E}[C^t] \rangle \\
 &= \frac{1}{2} \gamma^2 n(n-1) \langle \nabla F(x_0^t), \mathbb{E}_{i \neq j} H_i(x_0^t) \nabla f_j(x_0^t) \rangle - \gamma \langle \nabla F(x_0^t), \mathbb{E}[B^t] \rangle - \gamma \langle \nabla F(x_0^t), \mathbb{E}[C^t] \rangle.
 \end{aligned} \tag{E.6}$$

For the first term in the (E.6), we have further bound:

$$\begin{aligned}
 &\frac{1}{2} \gamma^2 n(n-1) \langle \nabla F(x_0^t), \mathbb{E}_{i \neq j} H_i(x_0^t) \nabla f_j(x_0^t) \rangle \\
 &= \frac{1}{2} \gamma^2 n^2 \langle \nabla F(x_0^t), \mathbb{E}_{i,j} H_i(x_0^t) \nabla f_j(x_0^t) \rangle - \frac{1}{2} \gamma^2 n \langle \nabla F(x_0^t), \mathbb{E}_i H_i(x_0^t) \nabla f_i(x_0^t) \rangle \\
 &\leq \frac{1}{2} \gamma^2 n^2 L \|\nabla F(x_0^t)\|^2 + \frac{1}{8} \gamma n \frac{\mu}{L} \|\nabla F(x_0^t)\|^2 + \frac{1}{2} \gamma^3 n \mu^{-1} L^3 G^2 \\
 &\leq (\gamma^2 n^2 L^2 + \frac{1}{4} \gamma n \mu) [F(x_0^t) - F^*] + \frac{1}{2} \gamma^3 n \mu^{-1} L^3 G^2.
 \end{aligned} \tag{E.7}$$

For the second term in (E.6), we use the bound

$$\begin{aligned}
 -\gamma \langle \nabla F(x_0^t), \mathbb{E}[B^t] \rangle &\leq \frac{1}{8} \gamma \frac{\mu}{L} n \|\nabla F(x_0^t)\|^2 + \frac{1}{2} \mu^{-1} \gamma^5 n^5 L^5 G^2 \\
 &\leq \frac{1}{4} \gamma \mu n [F(x_0^t) - F^*] + \frac{1}{2} \mu^{-1} \gamma^5 n^5 L^5 G^2.
 \end{aligned} \tag{E.8}$$

For the third term in (E.6), we use the bound

$$\begin{aligned}
 -\gamma \langle \nabla F(x_0^t), \mathbb{E}[C^t] \rangle &\leq \gamma \|\nabla F(x_0^t)\| \cdot (n^3 \gamma^2 L_H G^2) \\
 &= \gamma^3 n^3 \|\nabla F(x_0^t)\| L_H G^2 \\
 &\leq \frac{1}{2} n^2 \gamma^2 L \|\nabla F(x_0^t)\|^2 + \frac{1}{2L} n^4 \gamma^4 L_H^2 G^4 \\
 &\leq n^2 \gamma^2 L^2 [F(x_0^t) - F^*] + \frac{1}{2L} n^4 \gamma^4 L_H^2 G^4.
 \end{aligned} \tag{E.9}$$

Substituting (E.7) (E.8) (E.9) back to (E.6), we get

$$-\gamma \langle \nabla F(x_0^t), \mathbb{E}[R^t] \rangle \leq \left( \frac{1}{2} \gamma n \mu + 2n^2 \gamma^2 L^2 \right) [F(x_0^t) - F^*] + \frac{1}{2} \gamma^3 n \mu^{-1} L^3 G^2 + \frac{1}{2} \mu^{-1} \gamma^5 n^5 L^5 G^2 + \frac{1}{2L} n^4 \gamma^4 L_H^2 G^4. \tag{E.10}$$

Substituting (E.10) to (E.1), for one epoch we get recursion bound:

$$\mathbb{E}[F(x_0^{t+1}) - F^*]$$



$$\leq (1 - \frac{3}{2}n\mu\gamma + 4L^2n^2\gamma^2) [F(x_0^t) - F^*] + \frac{1}{2}\gamma^3n\mu^{-1}L^3G^2 + \frac{1}{2}\mu^{-1}\gamma^5n^5L^5G^2 + \frac{1}{2L}n^4\gamma^4L_H^2G^4 + \frac{1}{4}n^4\gamma^4G^2L^3. \quad (\text{E.11})$$

Now assume

$$\frac{1}{2}n\mu\gamma > 4L^2n^2\gamma^2,$$

which we call assumption 1, (E.11) can be further turned into:

$$\begin{aligned} & \mathbb{E}[F(x_0^{t+1}) - F^*] \\ & \leq (1 - n\mu\gamma) [F(x_0^t) - F^*] + \gamma^3nC_1 + n^4\gamma^4C_2 + n^5\gamma^5C_3. \end{aligned} \quad (\text{E.12})$$

where  $C_1 = \frac{1}{2}\mu^{-1}L^3G^2$ ,  $C_2 = \frac{1}{2L}L_H^2G^4 + \frac{1}{4}G^2L^3$ ,  $C_3 = \frac{1}{2}\mu^{-1}L^5G^2$ . Further assume  $n\gamma\mu < 1$ , which we call assumption 2, expanding (E.12) over all the epochs we finally get a bound for RANDOMSHUFFLE:

$$\mathbb{E}[F(x_T) - F^*] \leq (1 - n\gamma\mu)^{\frac{T}{n}} [F(x_0) - F^*] + \frac{T}{n} (\gamma^3nC_1 + \gamma^4n^4C_2 + \gamma^5n^5C_3).$$

Let  $\gamma = \frac{2\log T}{T\mu}$ , there is

$$\begin{aligned} \mathbb{E}[F(x_T) - F^*] & \leq \left(1 - \frac{2n\log T}{T}\right)^{\frac{T}{2n\log T} 2\log T} [F(x_0) - F^*] + \frac{T}{n} (\gamma^3nC_1 + \gamma^4n^4C_2 + \gamma^5n^5C_3) \\ & \leq \frac{1}{T^2} [F(x_0) - F^*] + \frac{1}{T^2} (\log T)^3 C_4 + \frac{n^3}{T^3} (\log T)^4 C_5 + \frac{n^4}{T^4} (\log T)^5 C_6, \end{aligned} \quad (\text{E.13})$$

where  $C_4 = \frac{8C_1}{\mu^3}$ ,  $C_5 = \frac{16C_2}{\mu^4}$ ,  $C_6 = \frac{32C_3}{\mu^5}$ . The second inequality comes from  $(1 - x)^{\frac{1}{x}} \leq \frac{1}{e}$  for  $0 < x < 1$ . Obviously, this is a result of the form  $O\left(\frac{1}{T^2} + \frac{n^3}{T^3}\right)$ .

What remains to determine is to satisfy the two assumptions: (1)  $\frac{1}{2}n\mu\gamma > 4L^2n^2\gamma^2$ , (2)  $n\gamma\mu < 1$ . The first is satisfied when

$$\frac{T}{\log T} > 16 \frac{L^2}{\mu^2} n.$$

The second assumption is satisfied when

$$\frac{T}{\log T} > 2n.$$

Since  $2 < \frac{L}{\mu}$ , the theorem is proved.  $\square$

## F. Proof of Theorem 6

*Proof.* For one epoch of RANDOMSHUFFLE, We have the following inequality

$$\begin{aligned} \|x_n^t - x^*\|^2 & = \|x_0^t - x^*\|^2 - 2\gamma \left\langle x_0^t - x^*, \sum_{i=1}^n \nabla f_{\sigma_\tau(i)}(x_{i-1}^t) \right\rangle + \gamma^2 \left\| \sum_{i=1}^n \nabla f_{\sigma_\tau(i)}(x_{i-1}^t) \right\|^2 \\ & = \|x_0^t - x^*\|^2 - 2\gamma \langle x_0^t - x^*, n\nabla F(x_0^t) \rangle - 2\gamma \langle x_0^t - x^*, R^t \rangle + \gamma^2 \|n\nabla F(x_0^t) + R^t\|^2 \\ & \leq \|x_0^t - x^*\|^2 - 2n\gamma [F(x_0^t) - F(x^*)] - 2\gamma \langle x_0^t - x^*, R^t \rangle + 2\gamma^2 n^2 \|\nabla F(x_0^t)\|^2 + 2\gamma^2 \|R^t\|^2 \\ & \leq \|x_0^t - x^*\|^2 - (2n\gamma - 2n^2\gamma^2L) [F(x_0^t) - F(x^*)] - 2\gamma \langle x_0^t - x^*, R^t \rangle + 2\gamma^2 \|R^t\|^2, \end{aligned} \quad (\text{F.1})$$

where the first inequality is because of

$$\langle x_0^t - x^*, \nabla F(x_0^t) \rangle \geq F(x_0^t) - F(x^*),$$

the second inequality is because of

$$\|\nabla F(x_0^t)\|^2 \leq L [F(x_0^t) - F(x^*)].$$

Therefore, taking expectation of (F.1) leads to:

$$\mathbb{E}[\|x_n^t - x^*\|^2] \leq \|x_0^t - x^*\|^2 - (2n\gamma - 2n^2\gamma^2L) [F(x_0^t) - F(x^*)] - 2\gamma \mathbb{E} \langle x_0^t - x^*, R^t \rangle + 2\gamma^2 \mathbb{E} [\|R^t\|^2], \quad (\text{F.2})$$

Define random variables

$$R_k^t = \sum_{i=1}^k [\nabla f_{\sigma_t(i)}(x_{i-1}^t) - \nabla f_{\sigma_t(i)}(x_0^t)],$$

where  $1 \leq k \leq n$ . Obviously  $R_n^t = R^t$ . We firstly show that  $\|R_k^t\| \leq 3n^2L\gamma(\|\nabla F(x_0^t)\| + \delta)$ , which is an important fact to be used in further analysis.

For any index  $1 \leq id \leq n$ , there is

$$\|\nabla f_{id}(x_1^t) - \nabla f_{id}(x_0^t)\| \leq L\gamma(\|\nabla F(x_0^t)\| + \delta).$$

Assume for any  $1 \leq id \leq n$  and some  $i$ , there is (which is obviously true when  $i = 1$ )

$$\|\nabla f_{id}(x_i^t) - \nabla f_{id}(x_0^t)\| \leq \left[ \sum_{j=0}^{i-1} (1 + L\gamma)^j \right] L\gamma(\|\nabla F(x_0^t)\| + \delta).$$

Then for  $i + 1$ , there is

$$\begin{aligned} \|\nabla f_{id}(x_{i+1}^t) - \nabla f_{id}(x_0^t)\| &\leq \|\nabla f_{id}(x_i^t) - \nabla f_{id}(x_0^t)\| + \|\nabla f_{id}(x_{i+1}^t) - \nabla f_{id}(x_i^t)\| \\ &\leq \|\nabla f_{id}(x_i^t) - \nabla f_{id}(x_0^t)\| + L\gamma(\|\nabla F(x_i^t)\| + \delta) \\ &\leq \|\nabla f_{id}(x_i^t) - \nabla f_{id}(x_0^t)\| + L\gamma(\|\nabla F(x_0^t)\| + \delta) + L\gamma(\|\nabla F(x_i^t) - \nabla F(x_0^t)\|) \\ &\leq (1 + L\gamma) \left[ \sum_{j=0}^{i-1} (1 + L\gamma)^j \right] L\gamma(\|\nabla F(x_0^t)\| + \delta) + L\gamma(\|\nabla F(x_0^t)\| + \delta) \\ &= \left[ \sum_{j=0}^i (1 + L\gamma)^j \right] L\gamma(\|\nabla F(x_0^t)\| + \delta). \end{aligned}$$

So by induction, there is

$$\|\nabla f_{id}(x_i^t) - \nabla f_{id}(x_0^t)\| \leq \left[ \sum_{j=0}^{i-1} (1 + L\gamma)^j \right] L\gamma(\|\nabla F(x_0^t)\| + \delta)$$

for all  $1 \leq i \leq n$ . Since  $\gamma \leq \frac{1}{16nL} \leq \frac{1}{nL}$ , there is  $1 + \gamma L \leq \frac{1}{n}$ . Therefore, we have

$$\begin{aligned} \|\nabla f_{id}(x_i^t) - \nabla f_{id}(x_0^t)\| &\leq \left[ \sum_{j=0}^{i-1} (1 + L\gamma)^j \right] L\gamma(\|\nabla F(x_0^t)\| + \delta) \\ &\leq \left[ n(1 + \frac{1}{n})^n \right] L\gamma(\|\nabla F(x_0^t)\| + \delta) \\ &\leq 3nL\gamma(\|\nabla F(x_0^t)\| + \delta). \end{aligned}$$

Therefore, for any  $1 \leq k \leq n$ , there is

$$\begin{aligned} \|R_k^t\| &\leq \sum_{i=1}^k \|\nabla f_{\sigma_t(i)}(x_{i-1}^t) - \nabla f_{\sigma_t(i)}(x_0^t)\| \\ &\leq \sum_{i=1}^k 3nL\gamma(\|\nabla F(x_0^t)\| + \delta) \end{aligned}$$

$$\leq 3n^2 L\gamma(\|\nabla F(x_0^t)\| + \delta).$$

Similar to the previous proof, we have the following decomposition for the error term:

$$\begin{aligned}
 R^t &= \sum_{i=1}^n [\nabla f_{\sigma_t(i)}(x_{i-1}^t) - \nabla f_{\sigma_t(i)}(x_0^t)] \\
 &= \sum_{i=1}^n \left[ \int_{x_0^t}^{x_{i-1}^t} H_{\sigma_t(i)}(x) dx \right] \\
 &= \sum_{i=1}^n \left[ \int_{x_0^t}^{x_{i-1}^t} H_{\sigma_t(i)} dx \right] + \sum_{i=1}^n \left[ \int_{x_0^t}^{x_{i-1}^t} (H_{\sigma_t(i)}(x) - H_{\sigma_t(i)}) dx \right] \\
 &= \sum_{i=1}^n [H_{\sigma_t(i)}(x_{i-1}^t - x_0^t)] + \sum_{i=1}^n \left[ \int_{x_0^t}^{x_{i-1}^t} (H_{\sigma_t(i)}(x) - H_{\sigma_t(i)}) dx \right] \\
 &= \sum_{i=1}^n \left[ H_{\sigma_t(i)} \sum_{j=1}^{i-1} (-\gamma \nabla f_{\sigma_t(j)}(x_{j-1}^t)) \right] + \sum_{i=1}^n \left[ \int_{x_0^t}^{x_{i-1}^t} (H_{\sigma_t(i)}(x) - H_{\sigma_t(i)}) dx \right] \\
 &= -\gamma \sum_{i=1}^n \left[ H_{\sigma_t(i)} \sum_{j=1}^{i-1} \nabla f_{\sigma_t(j)}(x_0^t) \right] - \gamma \sum_{i=1}^n \left\{ H_{\sigma_t(i)} \sum_{j=1}^{i-1} [\nabla f_{\sigma_t(j)}(x_{j-1}^t) - \nabla f_{\sigma_t(j)}(x_0^t)] \right\} \\
 &\quad + \sum_{i=1}^n \left[ \int_{x_0^t}^{x_{i-1}^t} (H_{\sigma_t(i)}(x) - H_{\sigma_t(i)}) dx \right] \\
 &= A^t + B^t + C^t.
 \end{aligned} \tag{F.3}$$

Here we define random variables

$$\begin{aligned}
 A^t &= -\gamma \sum_{i=1}^n \left[ H_{\sigma_t(i)} \sum_{j=1}^{i-1} \nabla f_{\sigma_t(j)}(x_0^t) \right], \\
 B^t &= -\gamma \sum_{i=1}^n \left\{ H_{\sigma_t(i)} \sum_{j=1}^{i-1} [\nabla f_{\sigma_t(j)}(x_{j-1}^t) - \nabla f_{\sigma_t(j)}(x_0^t)] \right\}, \\
 C^t &= \sum_{i=1}^n \left[ \int_{x_0^t}^{x_{i-1}^t} (H_{\sigma_t(i)}(x) - H_{\sigma_t(i)}) dx \right].
 \end{aligned}$$

There is

$$\mathbb{E}[A^t] = -\frac{n(n-1)}{2} \gamma \mathbb{E}_{i \neq j} [H_i \nabla f_j(x_0^t)], \tag{F.4}$$

$$\begin{aligned}
 \|B^t\| &\leq \gamma \sum_{i=1}^n H_{\sigma_t(i)} \sum_{j=1}^{i-1} \|\nabla f_{\sigma_t(j)}(x_{j-1}^t) - \nabla f_{\sigma_t(j)}(x_0^t)\| \\
 &\leq \gamma \sum_{i=1}^n L \sum_{j=1}^{i-1} 3nL\gamma(\|\nabla F(x_0^t)\| + \delta) \\
 &\leq 3\gamma^2 L^2 n^3 (\|\nabla F(x_0^t)\| + \delta).
 \end{aligned} \tag{F.5}$$

$$\|C^t\| \leq \sum_{i=1}^n \left[ \int_0^{\|x_{i-1}^t - x_0^t\|} \left\| H_{\sigma_t(i)} \left( x_0^t + t \frac{x_{i-1}^t - x_0^t}{\|x_{i-1}^t - x_0^t\|} \right) - H_{\sigma_t(i)} \right\| dt \right]$$

$$\begin{aligned}
 &\leq \sum_{i=1}^n [L_H \max \{ \|x_{i-1}^t - x^*\|, \|x_0^t - x^*\| \} \|x_{i-1}^t - x_0^t\|] \\
 &\leq nL_H D n \gamma G.
 \end{aligned} \tag{F.6}$$

Using (F.3) and (F.4), we can decompose the inner product of  $x_0^t - x^*$  and  $\mathbb{E}[R^t]$  into:

$$\begin{aligned}
 -2\gamma \langle x_0^t - x^*, \mathbb{E}[R^t] \rangle &= -2\gamma \langle x_0^t - x^*, \mathbb{E}[A^t] + \mathbb{E}[B^t] + \mathbb{E}[C^t] \rangle \\
 &= -2\gamma \langle x_0^t - x^*, \mathbb{E}[A^t] \rangle - 2\gamma \langle x_0^t - x^*, \mathbb{E}[B^t] \rangle - 2\gamma \langle x_0^t - x^*, \mathbb{E}[C^t] \rangle \\
 &= \gamma^2 n(n-1) \langle x_0^t - x^*, \mathbb{E}_{i \neq j} H_i \nabla f_j(x_0^t) \rangle - 2\gamma \langle x_0^t - x^*, \mathbb{E}[B^t] \rangle - 2\gamma \langle x_0^t - x^*, \mathbb{E}[C^t] \rangle.
 \end{aligned} \tag{F.7}$$

For the first term in (F.7), there is

$$\begin{aligned}
 &\gamma^2 n(n-1) \langle x_0^t - x^*, \mathbb{E}_{i \neq j} H_i \nabla f_j(x_0^t) \rangle \\
 &= \gamma^2 n(n-1) \mathbb{E}_{i \neq j} \langle H_i(x_0^t - x^*), \nabla f_j(x_0^t) - \nabla f_j(x^*) \rangle + \gamma^2 n(n-1) \langle x_0^t - x^*, \mathbb{E}_{i \neq j} H_i \nabla f_j(x^*) \rangle \\
 &\leq \gamma^2 n^2 \mathbb{E}_{i,j} \langle \nabla f_i(x_0^t) - \nabla f_i(x^*), \nabla f_j(x_0^t) - \nabla f_j(x^*) \rangle + \gamma^2 n(n-1) D \|\Delta\| \\
 &\quad + \gamma^2 n(n-1) \mathbb{E}_{i \neq j} \langle H_i(x_0^t - x^*) - (\nabla f_i(x_0^t) - \nabla f_i(x^*)), \nabla f_j(x_0^t) - \nabla f_j(x^*) \rangle \\
 &\leq \gamma^2 n^2 \|\nabla F(x_0^t)\|^2 + \gamma^2 n(n-1) D \|\Delta\| + \gamma^2 n(n-1) L_H L \|x_0^t - x^*\|^3.
 \end{aligned} \tag{F.8}$$

Here we introduce variable  $\Delta = \mathbb{E}_{i \neq j} [H_i \nabla f_j(x^*)]$  for simplicity of notation, with  $i, j$  uniformly sampled from all pairs of different indices. The last inequality is because of

$$\begin{aligned}
 \|H_i(x_0^t - x^*) - (\nabla f_i(x_0^t) - \nabla f_i(x^*))\| &= \left\| H_i(x_0^t - x^*) - \int_{x^*}^{x_0^t} H_i(x) dx \right\| \\
 &= \left\| \int_{x^*}^{x_0^t} (H_i - H_i(x)) dx \right\| \\
 &\leq \int_0^{\|x_0^t - x^*\|} \left\| H_i - H_i\left(x^* + t \frac{x_0^t - x^*}{\|x_0^t - x^*\|}\right) \right\| dt \\
 &\leq L_H \|x_0^t - x^*\|^2.
 \end{aligned}$$

For the second term in (F.7), we use (F.5) and have the bound

$$-2\gamma \langle x_0^t - x^*, \mathbb{E}[B^t] \rangle \leq 6\gamma^3 n^3 L^2 D (\|\nabla F(x_0^t)\| + \delta). \tag{F.9}$$

For the third term in (F.7), we use (F.6) and have the bound

$$-2\gamma \langle x_0^t - x^*, \mathbb{E}[C^t] \rangle \leq 2\gamma^2 n^2 L_H D^2 G. \tag{F.10}$$

Substituting (F.8) (F.9) and (F.10) back to (F.7), we get

$$\begin{aligned}
 -2\gamma \langle x_0^t - x^*, \mathbb{E}[R^t] \rangle &\leq \gamma^2 n^2 \|\nabla F(x_0^t)\|^2 + \gamma^2 n(n-1) D \|\Delta\| + 6\gamma^3 n^3 L^2 D (\|\nabla F(x_0^t)\| + \delta) \\
 &\quad + \gamma^2 n^2 L_H (LD^3 + 2D^2 G).
 \end{aligned} \tag{F.11}$$

Furthermore, we have

$$\begin{aligned}
 \mathbb{E}[\|R^t\|^2] &\leq [3n^2 L \gamma (\|\nabla F(x_0^t)\| + \delta)]^2 \\
 &\leq 18n^4 L^2 \gamma^2 (\|\nabla F(x_0^t)\|^2 + \delta^2).
 \end{aligned}$$

Inequality (F.2) can be simplified to:

$$\begin{aligned}
 \mathbb{E}[\|x_n^t - x^*\|^2] &\leq \|x_0^t - x^*\|^2 - (2n\gamma - 3n^2\gamma^2L) [F(x_0^t) - F(x^*)] + \gamma^2n(n-1)D\|\Delta\| + \gamma^2n^2L_H(LD^3 + 2D^2G) \\
 &\quad + 6\gamma^3n^3L^2D(\|\nabla F(x_0^t)\| + \delta) + 36n^4L^2\gamma^4(\|\nabla F(x_0^t)\|^2 + \delta^2). \\
 &\leq \|x_0^t - x^*\|^2 - (2n\gamma - 3n^2\gamma^2L) [F(x_0^t) - F(x^*)] + \gamma^2n(n-1)D\|\Delta\| + \gamma^2n^2L_H(LD^3 + 2D^2G) \\
 &\quad + 12\gamma^2n^2\|\nabla F(x_0^t)\|^2 + 12\gamma^4n^4L^4D^2 + 6\gamma^3n^3L^2D\delta + 36n^4L^2\gamma^4(\|\nabla F(x_0^t)\|^2 + \delta^2). \tag{F.12}
 \end{aligned}$$

By the definition of  $\gamma$ , there is

$$\begin{aligned}
 36n^4L^2\gamma^4 &\leq n^2\gamma^2, \\
 16n^2\gamma^2L &\leq n\gamma.
 \end{aligned}$$

So there is

$$\begin{aligned}
 \mathbb{E}[\|x_n^t - x^*\|^2] &\leq \|x_0^t - x^*\|^2 - (2n\gamma - 16n^2\gamma^2L) [F(x_0^t) - F(x^*)] + \gamma^2n(n-1)D\|\Delta\| \\
 &\quad + \gamma^2n^2L_H(LD^3 + 2D^2G) + 12\gamma^4n^4L^4D^2 + 6\gamma^3n^3L^2D\delta + 36n^4L^2\gamma^4\delta^2. \\
 &\leq \|x_0^t - x^*\|^2 - n\gamma [F(x_0^t) - F(x^*)] + \gamma^2n^2D\|\Delta\| \\
 &\quad + \gamma^2n^2L_H(LD^3 + 2D^2G) + 12\gamma^4n^4L^4D^2 + 6\gamma^3n^3L^2D\delta + 36n^4L^2\gamma^4\delta^2.
 \end{aligned}$$

Furthermore, there is

$$\begin{aligned}
 n\gamma [F(x_0^t) - F(x^*)] &\leq \|x_0^t - x^*\|^2 - \mathbb{E}[\|x_n^t - x^*\|^2] + \gamma^2n^2(D\|\Delta\| + L_HLD^3 + 2L_HD^2G) \\
 &\quad + 6\gamma^3n^3L^2D\delta + n^4\gamma^4(12L^4D^2 + 36L^2\delta^2). \tag{F.13}
 \end{aligned}$$

Taking expectation of (F.13) and summing over all epochs, we have:

$$T\gamma [F(\bar{x}) - F(x^*)] \leq D^2 + \gamma^2Tn(D\|\Delta\| + L_HLD^3 + 2L_HD^2G) + T\gamma^3n^2L^26D\delta + T\gamma^4n^3(12L^4D^2 + 36L^2\delta^2). \tag{F.14}$$

Substituting the step size into (F.14), we have

$$\begin{aligned}
 F(\bar{x}) - F(x^*) &\leq \frac{D^2}{T} \max \left\{ 16nL, \sqrt{\frac{Tn(\|\Delta\| + L_HLD^2 + 2L_HDG)}{D}}, \left(\frac{Tn^2L^2\delta}{D}\right)^{\frac{1}{3}}, (Tn^3L^4)^{\frac{1}{4}} \right\} \\
 &\quad + \frac{D\sqrt{nD}(\|\Delta\| + L_HLD^2 + 2L_HDG)}{\sqrt{T}} + \frac{6D(D^2n^2L^2\delta)^{\frac{1}{3}}}{T^{\frac{2}{3}}} + \frac{n^{\frac{3}{4}}}{T^{\frac{3}{4}}} \left( 12LD^2 + \frac{36\delta^2}{L} \right) \\
 &\leq \frac{2D\sqrt{nD}(\|\Delta\| + L_HLD^2 + 2L_HDG)}{\sqrt{T}} + \frac{7D(D^2n^2L^2\delta)^{\frac{1}{3}}}{T^{\frac{2}{3}}} + \frac{n^{\frac{3}{4}}}{T^{\frac{3}{4}}} \left( 13LD^2 + \frac{36\delta^2}{L} \right) + \frac{16D^2nL}{T}.
 \end{aligned}$$

Obviously, this result is of the form

$$\frac{2D\sqrt{nD}(\|\Delta\| + L_HLD^2 + 2L_HDG)}{\sqrt{T}} + \mathcal{O} \left( \left(\frac{n}{T}\right)^{\frac{2}{3}} \delta^{\frac{1}{3}} + \left(\frac{n}{T}\right)^{\frac{3}{4}} \right)$$

□

## G. Proof of Theorem 7

*Proof.* For both SGD and RANDOMSHUFFLE, we use  $s(i)$  to denote the index of component function picked in the  $i$ th iteration. We have the following inequality

$$\|x_t - x^*\|^2 = \|x_{t-1} - x^*\|^2 - 2\gamma \langle x_{t-1} - x^*, \nabla f_{s(t)}(x_{t-1}) \rangle + \gamma^2 \|\nabla f_{s(t)}(x_{t-1})\|^2$$

$$\begin{aligned}
 &= \|x_{t-1} - x^*\|^2 - 2\gamma \langle x_{t-1} - x^*, \nabla f_{s(t)}(x_{t-1}) - \nabla f_{s(t)}(x^*) \rangle + \gamma^2 \|\nabla f_{s(t)}(x_{t-1})\|^2 \\
 &\leq \|x_{t-1} - x^*\|^2 - 2\gamma \left( \frac{\|\nabla f_{s(t)}(x_{t-1}) - \nabla f_{s(t)}(x^*)\|^2}{L_{s(t)} + \mu_{s(t)}} + \frac{L_{s(t)}\mu_{s(t)}}{L_{s(t)} + \mu_{s(t)}} \|x_{t-1} - x^*\|^2 \right) + \gamma^2 \|\nabla f_{s(t)}(x_{t-1})\|^2 \\
 &= (1 - 2\gamma \frac{L_{s(t)}\mu_{s(t)}}{L_{s(t)} + \mu_{s(t}}) \|x_{t-1} - x^*\|^2 - \gamma \left( \frac{2}{L_{s(t)} + \mu_{s(t)}} - \gamma \right) \|\nabla f_{s(t)}(x_{t-1})\|^2 \\
 &\leq (1 - 2\gamma \frac{L_{s(t)}\mu_{s(t)}}{L_{s(t)} + \mu_{s(t)}} + \mu_{s(t)}^2 \gamma^2 - 2\gamma \frac{\mu_{s(t)}^2}{L_{s(t)} + \mu_{s(t}}) \|x_{t-1} - x^*\|^2 \\
 &= (1 - 2\gamma \mu_{s(t)} + \mu_{s(t)}^2 \gamma^2) \|x_{t-1} - x^*\|^2 \\
 &= (1 - \gamma \mu_{s(t)})^2 \|x_{t-1} - x^*\|^2.
 \end{aligned}$$

The first inequality is by Theorem 2.1.11 in (Nesterov, 2013), the second inequality is by the definition of strongly convexity. So we have

$$\mathbb{E} \|x_T - x^*\|^2 \leq \mathbb{E} \left[ \prod_{i=1}^T (1 - \gamma \mu_{s(i)})^2 \right] \|x_{t-1} - x^*\|^2.$$

By the AM-GM inequality, we know the term  $\mathbb{E} \left[ \prod_{i=1}^T (1 - \gamma \mu_{s(i)})^2 \right]$  for RANDOMSHUFFLE is no larger than that of SGD. Also, this bound is tight when we consider  $f_i(x) = \frac{\mu_i}{2} \|x - x^*\|^2$ , which completes the proof.  $\square$

## H. SGD under Polyak-Łojasiewicz condition

For the completeness of the paper, we include the following analysis of SGD under Polyak-Łojasiewicz condition.

**Theorem 1.** *For finite sum problem satisfying Polyak-Łojasiewicz condition with parameter  $\mu$ , Lipschitz constant  $L$ , setting step size*

$$\gamma = \frac{\log T}{\mu T},$$

there is

$$F(x_T) - F^* \leq \mathcal{O}\left(\frac{1}{T}\right).$$

*Proof.* We have the following one iteration for SGD with step size  $\gamma$ :

$$x_{t+1} = x_t - \gamma \nabla f_{s(t)}(x_t). \tag{H.1}$$

Given  $x_t$ , there is randomness over index

$$\mathbb{E}[F(x_{t+1})] - F^* \leq F(x_t) - \gamma \mathbb{E}[\langle \nabla F(x_t), \nabla f_{s(t)}(x_t) \rangle] + \frac{L}{2} \gamma^2 \mathbb{E}[\|\nabla f_{s(t)}(x_t)\|^2] - F^* \tag{H.2}$$

$$= F(x_t) - \gamma \langle \nabla F(x_t), \nabla F(x_t) \rangle + \frac{L}{2} \gamma^2 \mathbb{E}[\|\nabla f_{s(t)}(x_t)\|^2] - F^* \tag{H.3}$$

$$\leq F(x_t) - \gamma \mu [F(x_t) - F^*] + \frac{L}{2} \gamma^2 G^2 - F^* \tag{H.4}$$

$$= (1 - 2\gamma \mu) [F(x_t) - F^*] + \frac{L}{2} \gamma^2 G^2. \tag{H.5}$$

The first inequality is because

$$F(x) \leq F(y) + \langle x - y, \nabla F(y) \rangle + \frac{L}{2} \|x - y\|^2.$$

The second inequality is because of the definition of PL condition.

Expanding over iterations leads to

$$\mathbb{E}[F(x_T) - F^*] \leq (1 - 2\gamma\mu)^T [F(x_0) - F^*] + \frac{L}{2} T \gamma^2 G^2.$$

Setting  $\gamma = \frac{\log T}{\mu T}$  leads to a  $O(\frac{1}{T})$  convergence of  $F(x_T) - F^*$ . □

## References

Y. Nesterov. *Introductory lectures on convex optimization: A basic course*, volume 87. Springer Science & Business Media, 2013.
